# Supplementary material for: Balancing Scarce Hospital Resources During a Pandemic: A Case-Study of COVID-19 at Addenbrooke’s Hospital (UK)
Source: Research Square preprint supplement (doi:10.21203/rs.3.rs-94739/v1), 2020-10-20
Supplement: Supplementary file 1 [file 411dbef89c430ad0462fb7b2.xlsx]

## Sheet: Sheet1
General Wards
Ward Number	Ward Name
1	GIM-D10
2	GIM-MSEU
3	GIM-C5
4	GIM-C6
5	GIM-C7
6	GIM-D7
7	GIM-D6
8	GIM-D8
9	GIM-C8
10	GIM-D5
11	GIM-D9
12	GIM-MDU
13	GIM-F4
14	GIM-G4
15	GIM-F6
16	GIM-G6
17	GIM-A4
18	GIM-A5
19	GIM-K3
20	GIM-Additional Beds
21	GIM-Surge+
22	GIM-Modular1
23	GIM-Modular2
24	GIM-Modular3
25	GIM-Extra1
26	GIM-Extra2
27	GIM-Extra3
28	GIM-Extra4
29	GIM-Extra5
30	GIM-Extra6
31	GIM-Extra7
32	GIM-Extra8
33	GIM-Extra9
34	GIM-Extra10
35	GIM-Extra11
36	GIM-Extra12
37	GIM-Extra13
38	GIM-Extra14
39	GIM-Extra15
40	ICU-JVF
41	ICU-NCCU
42	ICU-A3
43	ICU-IDARRT
44	ICU-J3
45	ICU-OIR
46	ICU-Main Rec
47	ICU-Ortho Rec
48	ICU-A3 DOSA
49	ICU-C4
50	ICU-Operating Theatres
51	ICU-Extra1
52	ICU-Extra2
53	ICU-Extra3
54	ICU-Extra4
55	ICU-Extra5
56	ICU-Extra6
57	ICU-Extra7
58	ICU-Extra8
59	ICU-Extra9
60	PAED-C3
61	PAED-CDU
62	PAED-D2
63	PAED-Extra1
64	PAED-Extra2
65	PAED-Extra3
66	PAED-Extra4
67	PAED-Extra5
68	PAED-Extra6
69	PAED-Extra7
70	PICU-PICU
71	PICU-Extra1
72	PICU-Extra2
73	PICU-Extra3
74	PICU-Extra4
